# Supplementary material for: Effects of Cinacalcet on Atherosclerotic and Nonatherosclerotic Cardiovascular Events in Patients Receiving Hemodialysis: The EValuation Of Cinacalcet HCl Therapy to Lower CardioVascular Events (EVOLVE) Trial
Source: PubMed Central journal article supplement — J Am Heart Assoc. 2014 Nov 17;3(6):e001363. doi: 10.1161/JAHA.114.001363 (PMC4338730; doi:10.1161/jaha.114.001363), 2014-11-17
Supplement: jah3-3-e001363-s1.pdf [file jah3-3-e001363-s1.pdf]

## List of participating EVOLVE sites and affiliated investigators, with enrollment by country (# enrolled):

**Argentina** (341): FMC Tucuman 2 (39) - J. Santos; Instituto de Dialisis Mansilla (35) - C. Najun Zarazaga; FMC Mendoza 2 (21) - I. Marin; FMC Moron (20) - N. Garrote; Instituto de Nefrologia Pergamino SRL (18) - A. Cusumano; Centro del Rinon y Dialisis S.A. (18) - N. Penalba; FMC Quilmes 2 (15) - E. Del Valle; Fundacion J. Robert Cade (14) - L. Juncos; Centro de Hemodialisis Temperley SRL (13) - J. Martinez Saye; FMC Monte Grande (13) - L. Lef; FME Salta (12) - V. Altobelli; FMC Resistencia (12) - G. Petraglia; Hospital Italiano de Buenos Aires (11) - G. Rosa Diez; Hospital Privado Centro Medico de Cordoba (10) - W. Douthat; FMC Martinez (10), J. Lobo, C. Gallart; FMC San Rafael (10) - A. Lafalla; FMC Necochea (8) - G. Diez; Instituto Medico Constituyentes (8) - B. Linares; FMC Rosario - Hospital Español (8) - N. Lopez; FMC Formosa (8) - N. Ramirez, R. Gonzalez; FMC Burzaco (8) - R. Valtuille; CEREHA (7) - H. Beresan; Diaverum Argentina S.A. (7) - O. Hermida; FMC Brown (7) - G. Rudolf; Rennius (5) - N. Marchetta; Hospital General de Agudos Dr. Cosme Argerich (2) - M. Rano; CENDI (2) - M. Ramirez; Fundacion Colombo Diaz - N. Garcia

**Australia** (149): John Hunter Hospital (16) - A. Gillies, B. Jones; The Royal Melbourne Hospital (16) - E. Pedagogos, R. Walker; Canberra Hospital (13) - G. Talaulikar; Royal Adelaide Hospital (10) - K. Bannister; Liverpool Hospital (10) - M. Suranyi; Royal Brisbane and Womens Hospital (9) - A. Kark; Simon Roger's Consulting Rooms (8) - S. Roger; Monash Medical Centre (8) - P. Kerr; The Queen Elizabeth Hospital (7) - A. Disney; Austin Health (7) - P. Mount, M. Fraenkel; Launceston General Hospital (7) - M. Mathew, R. Fassett; Royal Hobart Hospital (7) - M. Jose; Princess Alexandra Hospital (6) - C. Hawley; Wollongong Hospital (6) - M. Lonergan; Prince of Wales Hospital (6) - J. Mackie; Fremantle Hospital (4) - P. Ferrari; The Alfred Hospital (3) - S. Menahem, J. Sabto; Sir Charles Gairdner Hospital (3) - B. Hutchison; St Vincents Hospital (2) - R. Langham; Royal North Shore Hospital (1) - C. Pollock

**Austria** (60): Dialyseinstitut Gießauf GmbH (12) - H. Holzer; Krankenhaus der Elisabethinen Linz (12) - R. Oberbauer; Krankenanstalt der Stadt Wien - Rudolfstiftung (9) - I. Arias, H. Graf; Medizinische Universität Innsbruck (9) - G. Mayer; Landeskrankenhaus Feldkirch (5) - K. Lhotta; U. Neyer; Donaospital Smz-Ost (4) - R. Klauser-Braun; Medizinische Universität Wien (4) - W. Hoerl; Medizinische Universität Graz (3) - S. Horn; Wilhelminenspital der Stadt Wien (2) - J. Kovarik; Klinikum Wels - Grieskirchen GmbH - R. Kramar; Sozialmedizinisches Zentrum Süd, Kaiser Franz Josef Spital - M. Eigner

**Belgium** (100): RHMS Clinique Louis Caty (9) - M. Dhaene; Onze Lieve Vrouw Ziekenhuis (15) - J. Billiouw, J. De Meester; Centre Hospitalier Régional de La Citadelle (8) - X. Warling, P. Cambier-Dwelschauwers; Universitair Ziekenhuis Gasthuisberg (8) - P. Evenepoel; Ziekenhuis Netwerk Antwerpen Stuivenberg (8) - R. Daelemans; CHU Hôpital Universitaire Brugmann (7) - M. Dratwa; Heilig Hartziekenhuis (7) - B. Maes; Centre Hospitalier Wallonie Picardie - site IMC (7) - J. Stolear; Jessa Ziekenhuis - campus Virga Jesse (6) - T. Dejagere, J. Vanwalleghem; Ziekenhuis Netwerk Antwerpen Middelheim (5) - K. Bouman; Université Catholique de Louvain, Cliniques Universitaires Saint Luc (5) - M. Jadoul; Ziekenhuis Oost Limburg Campus St. Jan (5) - J. Peeters; Universitair Ziekenhuis Gent (4) - R. Vanholder; Universitair Ziekenhuis Brussel (4) - C. Tielemans; AZ Sint Lucas (2) - J. Donck

**Brazil** (301): Pavan & Almeida Médicos Associados SS Ltda- Hospital Santa Lucinda - PUCSP (27) - F. Almeida; Hospital de Base - Faculdade de Medicina de São José do Rio Preto / Fundação Faculdade Regional de Medicina de São José do Rio Preto (FUNFARME) (22) - J. Picollo de Oliveira, E. Burdmann;

Hospital Dom Vicente Scherer - Complexo Hospitalar da Santa Casa de Porto Alegre (21) - V. Garcia; Hospital de Clinicas de Porto Alegre HCPA (19) - F. Saldanha Thome; Fundação Pró Rim (17) - L. Deboni; Universidade do Estado do Rio de Janeiro, Clinica de Doencas Renais (16) - R. Bregman; Hospital Universitario Antonio Pedro (16) - J. Lugon; PRONTORIM S/C Ltda (15) - S. Araújo; Nefroclínica de Uberlândia Ltda (14) - S. Ferreira Filho; Universidade Federal do Ceará - HU Walter Cantídio (13) - E. de Francesco Daher; Instituto de Urologia e Nefrologia (11) - M. Sperto Baptista; Hospital do Rim e Hipertensão (10) - A. Carvalho; Hospital São Lucas da Pontifícia Universidade Católica do Rio Grande do Sul (10) - D. d'Avila; Serviço de Nefrologia de Ribeirão Preto (10) - M. Moyses Neto; Universidade Santo Amaro / UNISA / CLINEFRO (10) - L. Yu; Hosp Universitário da Univ Federal de Juiz de Fora - Centro Atendimento a Saude (8) - M. Bastos; Center for Clinical and Basic Research CCBR Brasil (8) - P. Sampaio Lacativa; Hospital das Clínicas da Faculdade de Medicina da Universidade de Sao Paulo, LIN 16 (FMUSP) (8) - V. Jorgetti; Hospital das Clínicas da Faculdade de Medicina de Ribeirão Preto da Universidade de Sao Paulo (7) - E. de Almeida Romão, J. Cardeal da Costa; Hospital Universitário Cajuru - PUC Paraná (7) - R. Pecoits Filho; Nefroclínica Serviços Médicos S/S Ltda (6) - P. Gordan; Hospital Universitário da Universidade Federal do Maranhão (6) - N. Salgado; Real e Benemérita Sociedade Portuguesa de Beneficência (4) - M. Teixeira Araújo; Centro de Tratamento Renal (4) - S. Neiva Coelho; Associação Renal Vida (4) - I. Oliveira; Hospital das Clínicas da Faculdade de Medicina da Universidade de São Paulo (3) - R. Moyses; Instituto Capixaba de Doenças Renais e Hipertensão (3) - L. Vasconcellos; Hospital Sao Rafael (2) - P. Batista; Centro de Pesquisa em Diabetes - J. Luiz Gross; Universidade Estadual de Ciências da Saúde de Alagoas - Hosp. do Açúcar - A. Pedrosa

**Canada** (146): Hôpital Charles-Lemoyne (15) - S. Cournoyer; Hopital Maisonneuve Rosemont (15) - M. LeBlanc; Entralogix - Don Mills (11) - S. Chow; Regina Qu'Appelle Health Region (11) - S. Karunakaran; Credit Valley Nephrology (10) - G. Wong; Sunnybrook Health Sciences Centre (9) - S. Tobe; CHUQ Centre Hotel-Dieu de Quebec (8) - S. Desmeules; Ottawa Hospital, Riverside Campus (8) - D. Zimmerman; Eastern Regional Health Authority (7) - S. Murphy; Centre Hospitalier Universitaire de Sherbrooke, Hôpital Fleurimont (6) - P. Montambault; St. Michael's Hospital (6) - S. Donnelly; University of Calgary (5) - J. MacRae, B. Culleton; Queen Elizabeth II Health Sciences Centre (5) - S. Soroka; St Joseph's Healthcare Hamilton (4) - C. Rabbat; Northern Alberta Renal Program, University of Alberta Hospital (4) - K. Jindal; Montreal General Hospital (4) - M. Vasilevsky; Royal Inland Hospital (4) - M. Michaud, E. Wijeyesinghe; Health Sciences Center (4) - J. Zacharias; Toronto General Hospital (4) - C. Lok; London Health Sciences Centre (2) - N. Muirhead; St. Boniface General Hospital (2) - M. Verrelli; Surrey Memorial Hospital (1) - G. Da Roza; Daniel Sapir Medicine Professional Corp (1) - D. Sapir

**Denmark** (19): Rigshospitalet (8) - K. Olgaard; Hillerød Sygehus (7) - H. Daugaard; L. Brandi; Odense University Hospital (4) - P. Jensen

**France** (80): Polyclinique Villeneuve Saint Goerges (20) - H. Boulechfar; Centre Hospitalier de Saint Brieu (9) - K. Ang, P. Simon; Hospitalier Maison Blanche - Reims (6) - P. Rieu; Centre Hospitalier Universitaire de la Timone - Hôpital d'enfants - Marseille (6) - P. Brunet; Centre Hospitalier La Milétrie Jean Bernard - Poitiers (6) - G. Touchard; Centre Hospitalier F H Manhes - Fleury Mérogis (5) - G. London; Clinique du Landy- Saint-Ouen (5) - P. Urena Torres; Hôpital Pellegrin - Bordeaux (3) - C. Combe; CHU Bicêtre (3) - A. Durrbach; Polyclinique Saint Roch - Cabestany (3) - J. Ortiz; Hôpital Civil - Strasbourg (3) - T. Hannedouche; Centre Hospitalier du Maréchal Joffre - Perpignan (3) - C. Vela; CHRU Albert Calmette - Lille (2) - A. Lionet; Hopital Clémenceau - Caen (2) - P. Ryckelynck; AGDUC - Grenoble (1) - P. Zaoui;

Groupe Hospitalier Sud-CHU Amiens- Salouel (1) - G. Choukroun; Hopital Tenon - Paris (1) - H. Fessi; CHU Hôpital Henri Mondor - Créteil (1) - P. Lang; Clinique Résidence du Parc - Marseille - P. Stroumza; Hopital Necker Enfants Malades - Paris - D. Joly; Hôpital du Bocage - Dijon - C. Mousson; Hopitaux Universitaires de Strasbourg - Lyon - M. Laville

**Germany** (162): Gemeinschaftspraxis Karlstrasse (22) - F. Dellanna; St. Joseph-Krankenhaus (15) - C. Erley; KfH Nierenzentrum Nürnberg(11) - J. Braun; Gemeinschaftspraxis Mörikestraße (9) - M. Rambauser; Klinikum Darmstadt (9) - W. Riegel; Praxis Kuan, Dannemann, Klingberg (9) - M. Klingberg; Praxis für Nieren- und Hochdruckkrankheiten (8) - E. Schwertfeger; Georg-Haas-Dialysezentrum Gießen (8) - V. Wizemann; Universität Erlangen-Nürnberg (7) - K. Eckardt; Nephrologisches Zentrum Villingen-Schwenningen (7) - H. Reichel; Medizinische Einrichtung der RWTH Aachen (6) - J. Floege; Universitätsklinikum "Carl Gustav Carus" der Technischen Universität Dresden (6) - J. Passauer; Dialysepraxis Reutlingen (6) - E. Hübel; Dialysezentrum Marienpark (6) - N. Frischmuth; KfH Nierenzentrum Regensburg (6) - R. Liebl; Halle/Saale (4) - R. Fiedler; Medizinische Universitätsklinik Heidelberg, sektion Nephrologie (4) - V. Schwenger; Praxis Dr. Voßkühler (4) - A. Voßkühler; Universitätsklinikum Schleswig-Holstein - Campus Kiel, Klinik für Nieren- und Hochdruckkrankheiten (4) - U. Kunzendorf, L. Renders; KfH Nierenzentrum Bochum (3) - D. Rattensberger, L. Rump; Klinikum Coburg gGmbH, Nephrologische Klinik (3) - M. Ketteler; Charité Universitätsmedizin Berlin, Campus Mitte (2) - H. Neumayer; Klinikum Bremen Mitte (2) - F. Zantvoort; Universitätsklinikum Hamburg-Eppendorf (1) - R. Stahl

**Hungary** (133): FMC Dializis Központ Miskolc (19) - E. Ladanyi; B. Braun Avitum Hungary Zrt. 6. sz. Dializis Kozpont (18) - I. Kulcsar; FMC Dializis Kozpont Hatvan (14) - I. Mezei; FMC Szatellita Dializis Kozpont Pecs (13) - B. Csiky; FMC Dializis Kozpont Peterfy Korhaz (10) - C. Rikker; FMC Dializis Kozpont Szepvolgyi ut (9) - O. Arkossy; Semmelweis Egyetem I. Belklinika (8) - K. Berta; B. Braun Avitum Hungary Zrt. 2. sz. Dializis Kozpont (8) - J. Szegedi; FMC Dializis Kozpont Esztergom (8) - L. Major; B. Braun Avitum Hungary Zrt. 11. sz. Dializis Kozpont (5) - S. Ferenczi; Diaverum Dializis Kozpont Baja (5) - A. Fekete; B. Braun Avitum Hungary Zrt. 14. sz. Dializis Kozpont (5) - T. Szabo; B. Braun Avitum Hungary Zrt. 9. sz. Dializis Kozpont (3) - G. Zakar; B. Braun Avitum Hungary Zrt. 7. sz. Dializis Kozpont (3) - G. Wagner; B. Braun Avitum Hungary Zrt. 16. sz. Dializis Kozpont (3) - S. Kazup Erdelyine; B. Braun Avitum Hungary Zrt. 10.sz. Dializis Kozpont (2) - B. Borbas

**Ireland** (11): Cork University Hospital (7) - J. Eustace; Merlin Park Hospital (4) - D. Reddan

**Italy** (137): Seconda Universita di Napoli. (16) - G. Capasso; Azienda Ospedaliera di "Alessandro Manzoni" Lecco (14) - F. Locatelli; Fondazione Salvatore Maugeri Irccs (12) - G. Villa; Azienda Ospedaliera San Paolo (9) - M. Cozzolino, D. Brancaccio; Fondazione IRCCS Ca Granda Ospedale Maggiore Policlinico (9) - P. Messa; Azienda Usl 8 di Cagliari (8) - P. Bolasco; P. O. Milazzo (8) - B. Ricciardi; Istituti Ospitalieri di Cremona (7) - F. Malberti; IRCCS Azienda Ospedaliera Universitaria San Martino - IST (7) - E. Moriero, G. Cannella; Istituti Ospitalieri di Verona (6) - V. Ortolda; Policlinico S. Orsola Malpighi (5) - S. Stefoni; Azienda Ospedaliera Universitaria Ospedali Riuniti Umberto I Lancisi Salesi (5) - G. Frascà; Azienda Ospedaliera Universitaria - Policlinico di Modena (4) - G. Cappelli, A. Albertazzi; Azienda Ospedaliera Bianchi Melacrino Morelli (4) - C. Zoccali; Ospedale Maggiore di Lodi (4) - M. Farina, A. Elli; Azienda Sanitaria Locale 4 (4) - F. Avella; Ospedali Riuniti di Bergamo (3) - P. Ondei, G. Mingardi; Azienda Ospedaliera di Perugia (Silvestrini) (3) - R. Errico, A. Losito; Azienda Ospedaliera San Camillo Forlanini (3)

- S. Di Giulio; Policlinico di Bari (2) - G. Pertosa, F. Schena; Azienda Ospedaliera Ospedali Riuniti (2) - G. Grandaliano, L. Gesualdo; Presidio Ospedaliero San Leonardo (2) - M. Auricchio

**Mexico** (45): FMC de Investigacion Clinical (19) - T. Bochicchio-Ricardelli; FMC Medica Sur (10) - J. Correa-Rotter; Nefrologia y Dialisis de San Luis S.C (4) - F. Aranda Verástegui; Hospital Angeles Mocel (4) - J. Peña; Hospital Hidalgo, Clinica San Cosme (3) - A. Chew Wong; Hospital Universitário U. A. N. L. (3) - J. Cruz-Valdez; Unidad de Hemodialisis, Centro Medico Dalinde (1) - M. Torres Zamora, M. Solis; Unidad de Hemodialisis Guadalupe. FMC (1) - M. Sebastian Diaz; Hospital Juarez de Mexico SA de CV - M. Vital Flores; FMC SA of CV - E. Alvarez Sandoval

**Netherlands** (29): Maasstad Ziekenhuis, lokatie Zuider (9) - M. van den Dorpel; Medisch Spectrum Twente (6) - H. Brink; Viecuri Ziekenhuis (5) - W. Van Kuijk; Deventer Ziekenhuis (3) - C. Vermeij; Albert Schweitzer Ziekenhuis, Locatie Amstelwijk (2) - P. Smak Gregoor; Meander Medisch Centrum (2) - E. Hagen; Academic Hospital Maastricht (2) - F. van der Sande

**Poland** (116): Akademicki Szpital Kliniczny im. Jana Mikulicza-Radeckiego we Wroclawiu (13) - M. Klinger; Uniwersytecki Szpital Kliniczny nr 1 im. Norberta Barlickiego w Lodzi (11) - M. Nowicki; Wojewodzki Szpital Zespólny im. Ludwika Rydygieraw Toruniu (11) - M. Muszytowski; Wojewodzki Szpital Zespólny w Kielcach (11) - K. Bidas; Wojewodzki Szpital Specjalistyczny im. Fryderyka Chopina w Rzeszowie (11) - W. Bentkowski; Samodzielny Publiczny Szpital Kliniczny im. Andrzeja Mieleckiego Slaskiego Uniwersytetu Medycznego w Katowicach (10) - A. Wiecek; Samodzielny Publiczny Szpital Kliniczny nr 4 w Lublinie (9) - A. Ksiązek; Samodzielny Publiczny Szpital Wojewodzki im. Papieża Jana Pawła II w Zamosciu (9) - K. Marczewski; Wojewodzki Szpital Zespólny w Plocku (8) - M. Ostrowski, M. Switalski; Samodzielny Publiczny Zakład Opieki Zdrowotnej Szpital Uniwersytecki w Krakowie (6) - W. Sulowicz; Samodzielny Publiczny Centralny Szpital Kliniczny w Warszawie (6) - J. Matuszkiewicz-Rowinska; Wojewodzki Szpital Specjalistyczny im. Kazimierza Dluskiego w Białymstoku (5) - M. Mysliwiec; Instytut Transplantologii Uniwersytetu Medycznego w Warszawie (4) - M. Durlik; Uniwersyteckie Centrum Kliniczne w Gdansk (2) - B. Rutkowski

**Portugal** (43): Diaverum Investimentos e Serviços Lda. – Unidade de Aveiro (16) - F. Macario; Uninefro SA – Unidade de Hemodiálise de Santo Tirso (10) - B. Carvalho; Diaverum Investimentos e Serviços Lda. – Unidade da Prelada (8) - J. Frazao; Sociedade Portuguesa de Diálise SA (5) - D. Machado; Eurodial - Centro de Nefrologia e Diálise de Leiria, Lda (Extensão de Óbidos) (4) - A. Weigert

**Russia** (283): Moscow State Institution of Public Health City Clinical Hospital #52 (32) - A. Andrusev; The State institution of public health, Yaroslavl Regional Clinical Hospital (26) - O. Khrustalev; St. Petersburg state budget institution of public health, City Mariinsky Hospital (21) - A. Zemtchenkov; St. Petersburg State institution of public health Elizavetinskaya hospital (19) - K. Gurevich; State institution of public health City Clinical Hospital #26 (18) - K. Staroselsky; State institution of public health Nikolaevskaya Hospital, Peterhof (18) - N. Khadikova; Company "Fesfarm" Center Extracorporal Therapy (18) - L. Rozhinskaya; State institution of public health City Hospital #31 (18) - G. Timokhovskaya; Federal state institution Scientific research institute for transplantology and artificial organs (17) - A. Stokov; Moscow State Institution of Public Health "City Clinical Hospital #24" (13) - O. Balkarova; State Healthcare Institution of City of Moscow, City Clinical Hospital S. P. Botkin (10) - V. Ermolenko; SEI of High Professional Skills "North-west State Medical University n.a. I.I.Mechnikov Roszdrava" (10) - E. Kolmakova, M. Komandenko; State institution of public health City Clinical Hospital #15 (10) - M. Timofeev; Moscow State

Healthcare Institution, City Clinical Hospital #20 (9) - V. Shilo; FSI North-Western Local Medical Center of Federal Agency of Public Health&Social Development (9) - G. Shostka; St. Petersburg State Medical University Acad. I.P. Pavlov Roszdrava (9) - A. Smirnov; Federal State institution N.I.Pirogov, Roszdrava (9) - V. Anashkin; Moscow State Institute of Public Health, Hospital for War Veterans #2 (7) - G. Volgina; SEI of High Professional Skills "North-west State Medical University n.a. I.I.Mechnikov Roszdrava" (7) - O. Domashenko, A. Gurevich; Federal Budgetary State Institution Scientific and Research Institute of Urology of MoH and SD of RF (3) - D. Perlin

**Spain** (78): Fundació Puigvert (11) - J. Martínez García, E. Andrés Ribes, E. Coll Piera; Hospital Universitario Ramón y Cajal (8) - M. Fernandez Lucas; Hospital Universitari Vall d'Hebron (8) - M. Galicia; Hospital Clínico Universitario San Cecilio (7) - M. Prados; Ciutat Sanitària i Universitària de Bellvitge (7) - M. González; Hospital Universitari Germans Trias i Pujol (6) - R. Romero; Hospital Universitario Marqués de Valdecilla (6) - Á. Martín de Francisco; Hospital de Galdakao (5) - J. Montenegro; Hospital General Universitario de Alicante (5) - C. Santiago; Hospital Universitario 12 de Octubre (4) - F. García, J. Alcázar de La Ossa; Hospital de Basurto (3) - J. Arrieta; Hospital General de Castellón (3) - J. Pons; Hospital Universitario Reina Sofía (2) - A. Martín-Malo; Althaia - Xarxa Assistencial de Manresa (2) - J. Soler Amigó; Hospital Clínic i Provincial de Barcelona (1) - A. Cases

**Sweden** (23): Skånes Universitetssjukhus, Malmö (5) - G. Sterner; Sahlgrenska Universitetssjukhuset Mölndal (5) - G. Jensen; Akademiska Sjukhuset, Uppsala (4) - B. Wikström; Danderyds Sjukhus (3) - S. Jacobson; Skånes Universitetssjukhus, Lund (3) - U. Lund; Centralsjukhuset, Karlstad (2) - L. Weiss; Länssjukhuset Ryhov, Jönköping (1) - A. Ståhl

**Switzerland** (37): Centre de Dialyse Cécil (13) - B. von Albertini; Centre Hospitalier Universitaire Vaudois (CHUV) (9) - M. Burnier; Hôpital régional Sion-Hérens-Conthey (6) - P. Meier; Hopitaux Universitaires de Geneve (HUG) (5) - P. Martin; Inselspital Bern (4) - D. Uehlinger; Universitaetsspital Basel - M. Dickenmann

**United Kingdom** (160): The Royal London Hospital (37) -M. Yaqoob; University Hospital Coventry (18) - D. Zehnder; Hope Hospital (13) -P. Kalra; Royal Free Hospital (12) -D. Wheeler; Western Infirmary Hospital (11) -N. Padmanabhan; Nottingham City Hospital (10) -S. Roe; Hull Royal Infirmary (10) -D. Eadington; Addenbrooke's Hospital (8) -N. Pritchard; Manchester Royal Infirmary (7) -A. Hutchison; University Hospital of North Staffordshire (7) -S. Davies; Northern General Hospital NHS Trust (6) -M. Wilkie; University Hospital of Wales (6) -M. Davies; Royal Liverpool Infirmary (5) -P. Pai; St Helier Hospital (3) -P. Swift, J. Kwan; Guys & St Thomas NHS Foundation Trust (2) -D. Goldsmith; Southmead Hospital (2) -C. Tomson; Royal Cornwall Hospital (2) -J. Stratton; Birmingham Heartlands Hospital (1) -I. Dasgupta

**United States** (1430): Advanced Kidney Specialists (38) -S. Sarkar; South Carolina Nephrology & Hypertension Center, Inc (36) -M. Moustafa; Renal Consultants Medical Group (27) -K. Gandhi; National Institute of Clinical Research- NICR (25) -A. Jamal; Instituto Renal Del Esté (24) -E. Galindo-Ramos; Northwestern University Feinberg School of Medicine (23) -J. Tuazon, D. Battle; St. Joseph's Regional Medical Center (23) - California Kidney Medical Group (22) -K. Tucker; Satellite Healthcare Inc. (21) -B. Schiller-Moran; Nephrology Associates of Northern Virginia, Inc. (20) -A. Assefi; Renal Physicians of Georgia, P.C. (20) -C. Martinez; Temple University Hospital (20) -L. Samuels, J. Goldman; Dr. Jose L. Cangiano-Rivera Private Practice (20) -J. Cangiano-Rivera; American Institute of Research (20) -R.

Darwish; DaVita Norwalk Dialysis Center (19) -M. Lee; St Clair Specialty Physicians (19) -J. Topf; Brandon Nephrology (19) -K. Kapatkin; National Institute of Clinical Research-NICR (19) -H. Baer, R. Kopelman; Outcomes Research International, Inc (18) -M. Acharya; Nephrology Associates PC (18) -D. Tharpe; Southwest Houston Research (17) -M. Bernardo; Capital Dialysis of Texas, Ltd. (17) -P. Nader; South Palm Beach Nephrology (16) -J. Guzman-Rivera; Renal Associates, P.A. (16) -P. Pergola; FMC (16) -M. Sekkarie; University of New Mexico (15) -E. Alas, P. Zager; Hypertension and Nephrology Associates, PA (14) -K. Liss; Genesis Clinical Research, Inc (14) -J. Navarro; Renal Associates of Baton Rouge (14) -M. Roppolo; University of North Carolina at Chapel Hill (14) -C. Denu-Ciocca, A. Kshirsagar; University of Cincinnati, College of Medicine (13) -M. El Khatib, K. Kant; Clinical Research Development Associates, LLC (13) -D. Scott; University of Texas, Health Science Center at Houston (13) -B. Murthyr Metabolism Associates, PC (12) -F. Finkelstein; Nephrology Specialists, PC (12) -G. Keightley; Arkansas Nephrology Services, Limited (12) -R. McCrary; University of Medicine and Dentistry of New Jersey (12) -J. Pitone, T. Cavaliere; DaVita Downey Dialysis (12) -A. Tsang; West Virginia University (12) -B. Pellegrino, R. Schmidt; Scribner Kidney Center (12) -S. Ahmad; State University of New York (SUNY), SUNY Downstate (12) -C. Brown, E. Friedman; Long Island College Hospital (11) -N. Mittman; Kidney Associates PLLC (11) -S. Fadem; Kidney Care Associates, PLLC (11) -W. Shapiro; Metropolitan Nephrology (11) -M. Reddy, S. Goldberger; Kings County Hospital Center (11) -C. Brown, Y. Woredekal; The Ohio State University (10) -A. Agarwal; Western Nephrology And Metabolic Bone Disease, PC (10) -M. Anger; Davita Great Bridge Dialysis Center (10) -M. Haque, P. Chidester; Comprehensive Dialysis Center of Western New York (10) -R. Kohli; Nassau University Medical Center (10) -S. Rubinstein; Knoxville Kidney Center, PLLC (10) -G. Newman; Nephrology of North Alabama (10) -R. Gladish; Peninsula Kidney Associates, PC (9) -O. Ayodeji; Henry Ford Hospital (9) -S. Soman; NorthShore University Health System (9) -S. Sprague; Idaho Nephrology Associates (9) -N. Hunt; Virginia Commonwealth University (9) -T. Gehr; University of Alabama at Birmingham (9) -D. Rizk, D. Warnock; Metro Hypertension and Kidney Center (9) -D. Polack; Regents of the University of California at Irvine Medical Center (8) -M. Pahl; Kidney and Hypertension Center (8) -D. Fischer; Renal Care Associates (8) -P. Dreyer, G. James; Ochsner Health Systems (8) -F. Husserl; Discovery Medical Research Group, Inc. (8) -T. Rogers; Montefiore Medical Center (8) -A. Raff; Case Western Reserve University, Metrohealth Campus (8) -J. Sedor, M. Silver; Kidney Care Associates, LLC (8) -M. Smith; California Institute of Renal Research (8) -S. Steinberg; Delaware Valley Nephrology & Hypertension Associates PC (8) -T. DelGiorno, E. Jones; Renal Hypertension Center (8) -P. D Cunha; Harlem Hospital Center (8) -J. Cheng, V. Pogue; Denver Nephrology, PC (7) -G. Block; Medical College of Wisconsin (7) -S. Blumenthal; Stamford Nephrology (7) -E. Brown; Nephrology Associates, Private Corporation (7) -C. Charytan; Columbia Nephrology Associates PA (7) -J. Buerkert, M. Cook; Greater Los Angeles Health Care Systems, West Los Angeles (7) -A. Felsenfeld; American Institute of Research (7) -N. Tareen, A. Gupta; Orchard Park Dialysis (7) -T. Herman; San Antonio Kidney Disease Center (7) -S. Diamond, C. Hura; Texas Tech University Health Sciences Center (7) -M. Laski; HNC Dialysis, LLC (7) -J. MacLaurin; University of Nebraska, Medical Center (7) -T. Plumb; University of Arkansas for Medical Sciences (7) -G. Brosnahan, J. Kumar; Bronx Nephrology and Hypertension (7) -M. Henriquez; Nephrology Associates (7) -C. Poole; Edward Hospital (7) -E. Osanloo; Lower Manhattan Dialysis Center (7) -A. Matalon; Chris Sholer MD, PC (7) -C. Sholer; Nephrology Specialists, PC (6) -S. Arfeen; Renal Research Center (6) -M. Azer; Biolab Research, LLC (6) -M. Belledonne; University of Rochester, Strong Memorial Hospital Cancer Center (6) -M. Gross; St Alexius Medical Center (6) -E. Dunnigan; Jefferson Nephrology (6) -K. McConnell; AMS Nephrology / Dialysis Center (6) -B. Becker, Skinner; Holy Name Medical Center (6) -R. Rigolosi; The University of Colorado Denver (6) -D. Spiegel; Kidney Group of Memphis (6) -M.

Stegman; Infosphere Clinical Research (6) -R. Patak, D. Streja; Nephrology Associates of Central Florida, P.A. (6) -U. Ranjit, T. Youell; Nephrology and Hypertension Associates (6) -T. Wooldridge; New Lexington Clinic, PSC (6) -C. Stafford; Hypertension and Nephrology, Inc. (6) -R. Cottiero, M. Weinberg; South Arkansas Kidney Center (6) -M. Schonefeld; Ong, Rubin, Shamir, A Medical Corporation Doing Buisness as Solano Kidney Care INC (6) -E. Shahmir; North Shore University Hospital (5) -A. Hazzan, A. Ashfaq; Nephrology Specialists of Oklahoma (5) -K. Bhandari; Southwest Atlanta Nephrology (5) -W. Cleveland; University of South Alabama (5) -M. Culpepper; Santa Fe Springs Dialysis Center (5) -J. Golden; University of Arizona, College of Pharmacy (5) -L. Lai, Y. Lien; Clinical Research & Consulting Center, LLC (5) -V. Lorica; Apex Research of Riverside (5) -J. Robertson; University of Kansas Medical Center (5) - Providence Kidney Care Spokane (5) -K. Malireddi; Louisiana State Univeristy Health Sciences Center (5) -S. Morse, V. Thakur; Portland Hypertension and Nephrology Clinic (5) -A. Israelit, P. Raguram; University of Massachusetts, Memorial Medical Center (5) -H. Alfred; Fletcher Allen Health Care (5) -W. Weise; Michigan Kidney Consultants (4) -F. Al-Saghir; Academic Medical Research Institute (4) -M. El Shahawy; Davita Century City Dialysis Center (4) -A. Rastogi, A. Nissenson; Northeast Clinical Research Centers, LLC (4) -N. Kopyt; Nephrology & Hypertension Associates (4) -R. Lynn; Emory University (4) -J. Lea, W. McClellan; Liberty Dialysis - Hopewell (4) -P. Teredesai; Nephrology Medical Associates (4) -S. Ong, S. Tolkan; Liberty Dialysis-Hawaii (4) -J. Sugihara; Nephrology Associates Research Center (4) -T. Minga; Los Angeles Biomedical Research Institute at Harbor UCLA Medical Center (4) -R. Mehrotra; Glendale Kidney Center (4) -R. Minasian; Central Atlanta Dialysis (3) -D. Bhatia; Our Lady of Lourdes Medical Center (3) -R. Specter, J. Capelli; Nephrology Center DBA Paragon Health PC (3) -P. Sidhu, S. Dalal; Southwest Mississippi Nephrology, PLLC (3) -P. Dykes; Mount Auburn Nephrology (3) -M. Khan; Idaho Kidney Institute (3) -F. Rahim; Dayton Veterans Administration Medical Center (3) -M. Saklayen; Southwest Nephrology Associates (3) -A. Thomas; Davita Marlton (3) -B. Michael, M. Torres; Chabot Nephrology Medical Group, Inc. (3) -H. Al-Bander; Erie County Medical Center (3) -B. Murray; Academic Medical Research Institute (3) -A. Abukurah; Florida Kidney and Hypertension Care (2) -B. Gupta; Davita-Dialysis Center (2) -S. Nosrati; Albert Einstein Health Care Network (2) -R. Raja; Pines Clinical Research, Inc. (2) -S. Zeig; Cleveland Clinic Florida (2) -M. Braun, A. Amatya; Alpha Clinical Research LLC (2) -J. Endsley; Atlanta Nephrology Referral Center (2) -Z. Sharon; Our Lady of Lourdes Regional Medical Center (1) -A. Gupta; Michael E DeBakey VAMC (1) -G. Dolson; Beaumont Hospital, Royal Oak (1) -F. Dumler; Franklin Dialysis Center, Davita. (1) -K. Ntoso; William Jennings Bryan Dorn VA Medical Center (1) -S. Rosansky; Kidney and Hypertension Center PC (1) -N. Kumar; Medipace Medical Group (1) -V. Gura; VA New York Harbor Healthcare System (1) -N. Thompson, D. Goldfarb; Bayview Nephrology Inc. (1) -R. Halligan; Duke University Medical Center (1) -J. Middleton; Paramount Dialysis Center (1) -A. Widerhorn; SUNY at Stony Brook -L. Arbeit; University of Illinois at Chicago -J. Arruda; Arms Dodge Robinson Wilber & Crouch, Inc -T. Crouch; Liberty Dialysis-Banksville -L. Friedman; Nephrology Associates LLP - S. Khokhar; Davita Beverly Hills Dialysis Center -J. Mittleman; University of Maryland Medical Systems - P. Light; Davita Dialysis -B. Taparia; Liberty Dialysis - Washington -C. West; Tyler Nephrology Associates, PA -J. Cotton; Renal Physicians Inc -R. Dhingra; Island Renal Physicians, PC -L. Kleinman; Kennewick Clinic Nephrology -F. Arif; George Washington University -S. Lew; Green Clinic, LLC -T. Nammour; Medical Surgical Specialists -J. Sterrett; Beth Israel Deaconess Medical Center -M. Williams; Academic Medical Research Institute -J. Ramirez; Advanced Medical Research, LLC -J. Rubin; Mayo Clinic -J. McCarthy; Northwest Louisiana Nephrology LLC -S. Noble; Nephrology Associates of Syracuse -M. Chaffin, A. Rekhi
